# Supplementary material for: Hybrid Quinoline-Sulfonamide Complexes (M2+) Derivatives with Antimicrobial Activity
Source: PubMed Central journal article supplement (PMC7356327; doi:10.3390/molecules25122946), 2020-06-26

# Supporting information

## Hybrid Quinoline-Sulfonamide Complexes (M<sup>2+</sup>) Derivatives with Antimicrobial Activity

Dumitrelea Diaconu <sup>1,2</sup>, Violeta Mangalagiu <sup>2,\*</sup>, Dorina Amariuca-Mantu <sup>1</sup>, Vasilichia Antoci <sup>1</sup>, Cristian Levente Giuroiu <sup>3,\*</sup> and Ionel I. Mangalagiu <sup>1,2,\*</sup>

<sup>1</sup> Faculty of Chemistry, Alexandru Ioan Cuza University of Iasi, 11 Carol Bvd, 700506 Iasi, Romania; cucu.dumitrelea@yahoo.com (D.D.); dorinaiasi@yahoo.com (D.A.-M); vasilichia2004@yahoo.com (V.A.)

<sup>2</sup> Institute of Interdisciplinary Research – CERNESIM Center, Alexandru Ioan Cuza University of Iasi, 11 Carol Bvd, 700506 Iasi, Romania

<sup>3</sup> Endodontics, Faculty of Dental Medicine, Grigore T. Popa University of Medicine and Pharmacy, 16 Universității Str., 700115 Iasi, Romania

\* Correspondence: violeta.mangalagiu@uaic.ro (V.M.); giuroiu.cristian@umfiasi.ro (C.L.G.); ionelm@uaic.ro (I.I.M.)

### <sup>1</sup>H and <sup>13</sup>C{<sup>1</sup>H}-NMR spectra

4-chloro-*N*-(quinolin-8-yl)benzenesulfonamide (3a)

<sup>1</sup>H-NMR (500 MHz, DMSO-*d*<sub>6</sub>)

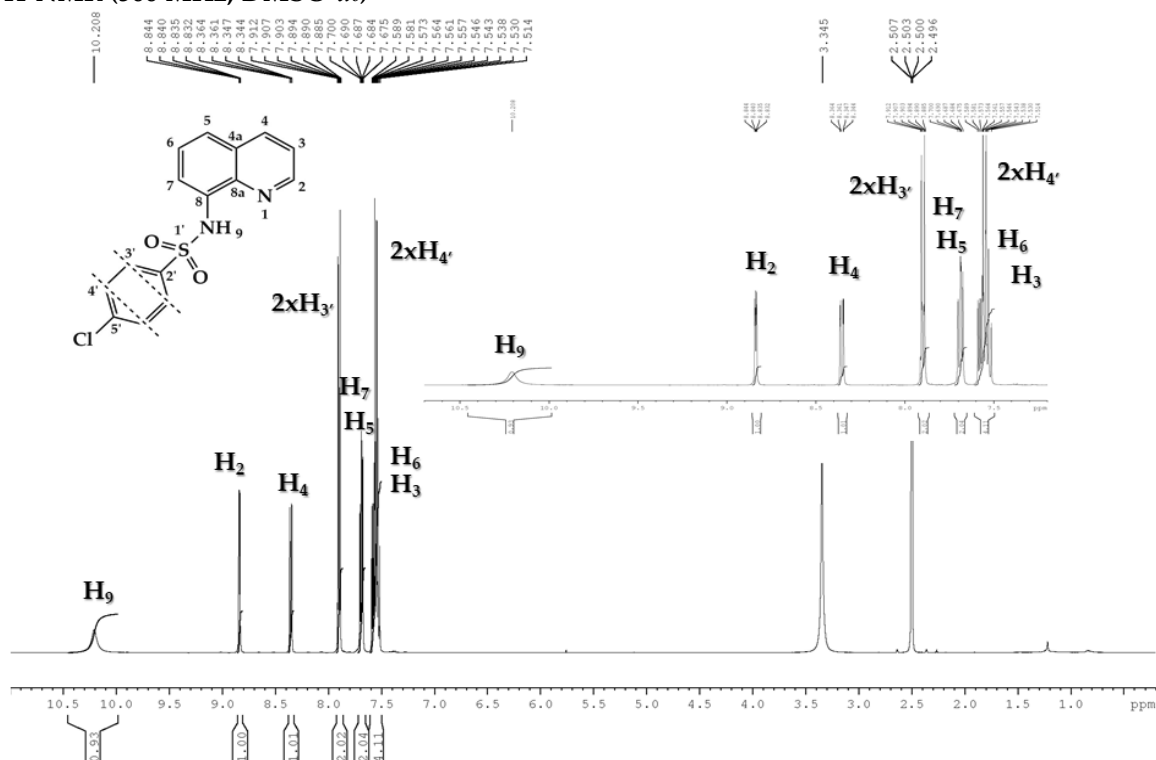

4-chloro-*N*-(quinolin-8-yl)benzenesulfonamide (**3a**)

$^{13}\text{C}\{^1\text{H}\}$ -NMR (125 MHz,  $\text{DMSO-}d_6$ )

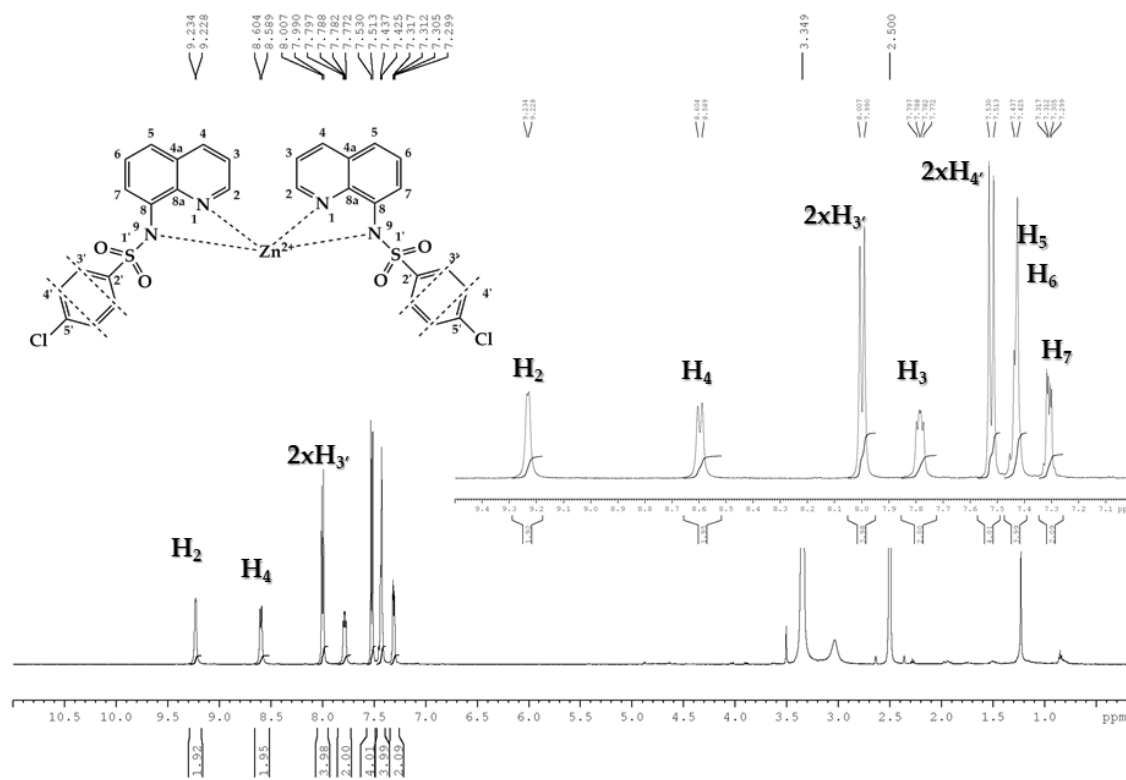

$[\text{Zn}(\text{N}-(\text{quinoline-8-yl})-4\text{-chloro-benzenesulfonamide})_2]$  (**4a**)

$^1\text{H}$ -NMR (500 MHz,  $\text{DMSO-}d_6$ )

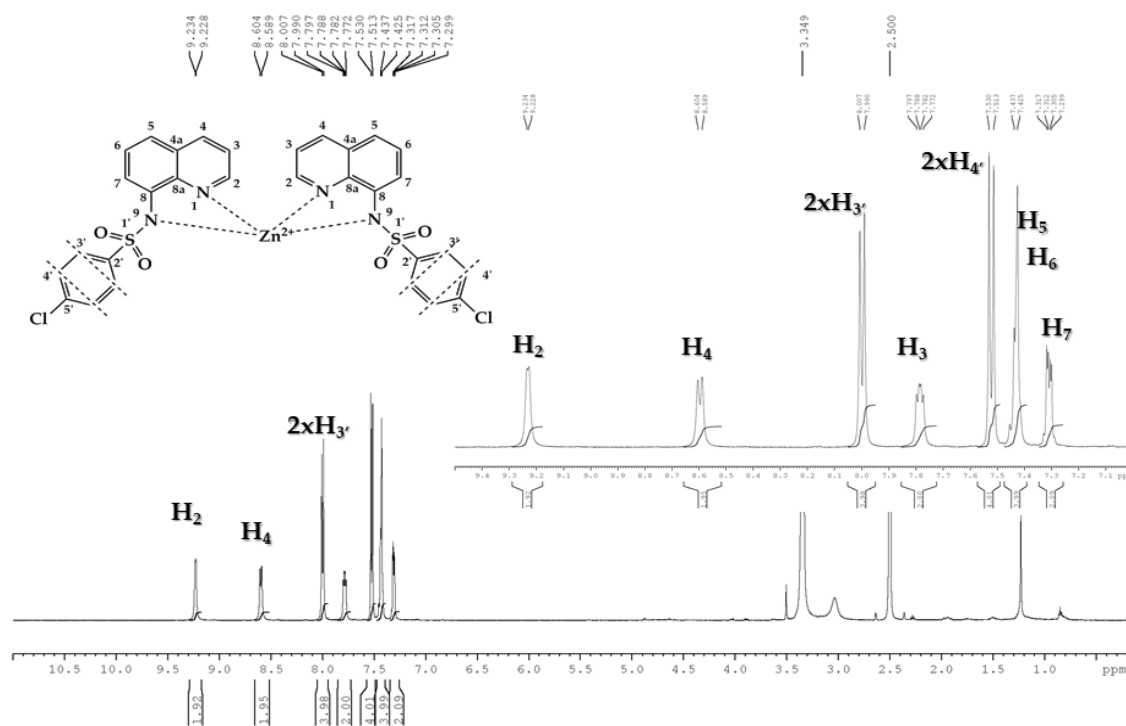

[Zn(N-(quinoline-8-yl)-4-chloro-benzenesulfonamide)<sub>2</sub>] (4a)

<sup>13</sup>C{<sup>1</sup>H}-NMR (125 MHz, DMSO-*d*<sub>6</sub>)

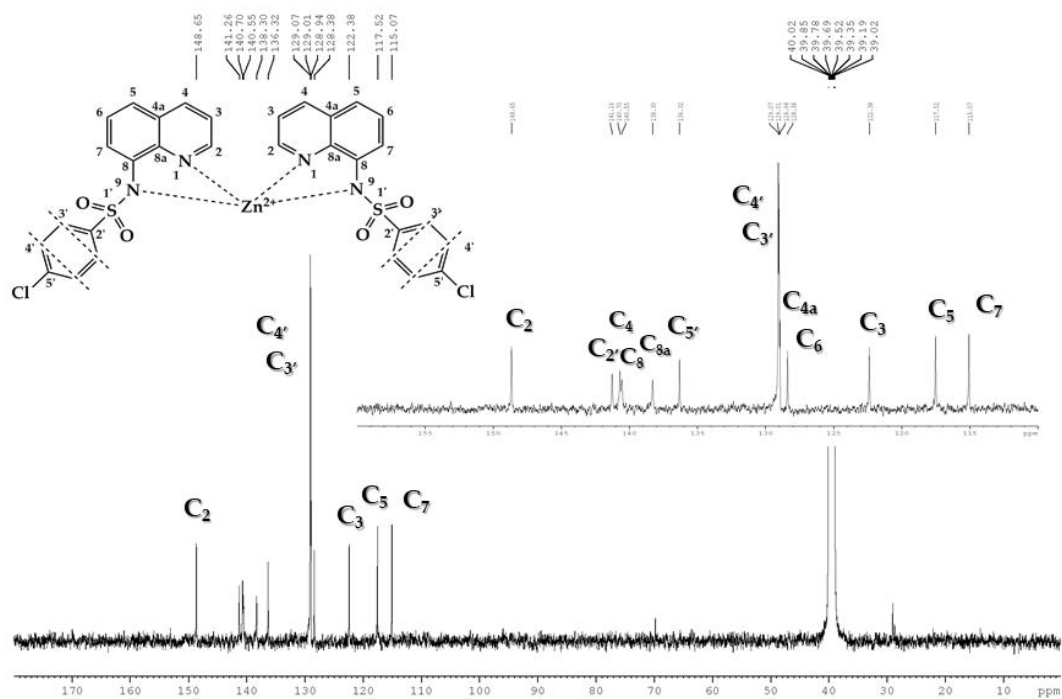

[Cd(N-(quinoline-8-yl)-4-chloro-benzenesulfonamide)<sub>2</sub>] (4d)

<sup>1</sup>H-NMR (500 MHz, DMSO-*d*<sub>6</sub>)

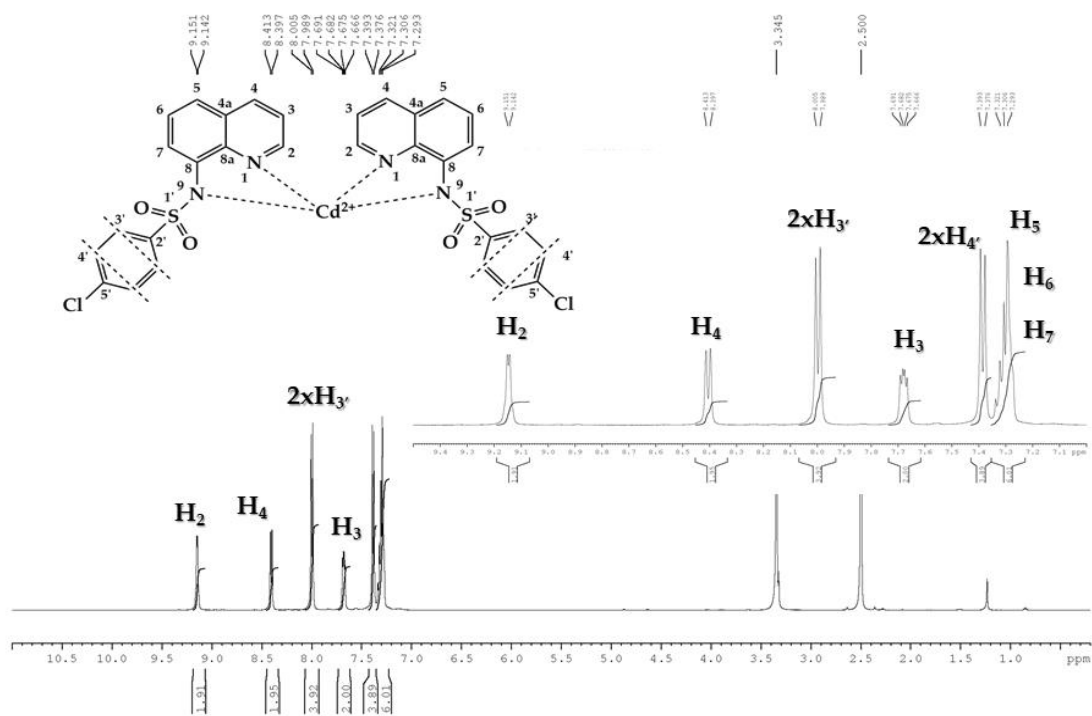

[Cd(N-(quinoline-8-yl)-4-chloro-benzenesulfonamide)<sub>2</sub>] (4d)

<sup>13</sup>C{<sup>1</sup>H}-NMR (125 MHz, DMSO-*d*<sub>6</sub>)

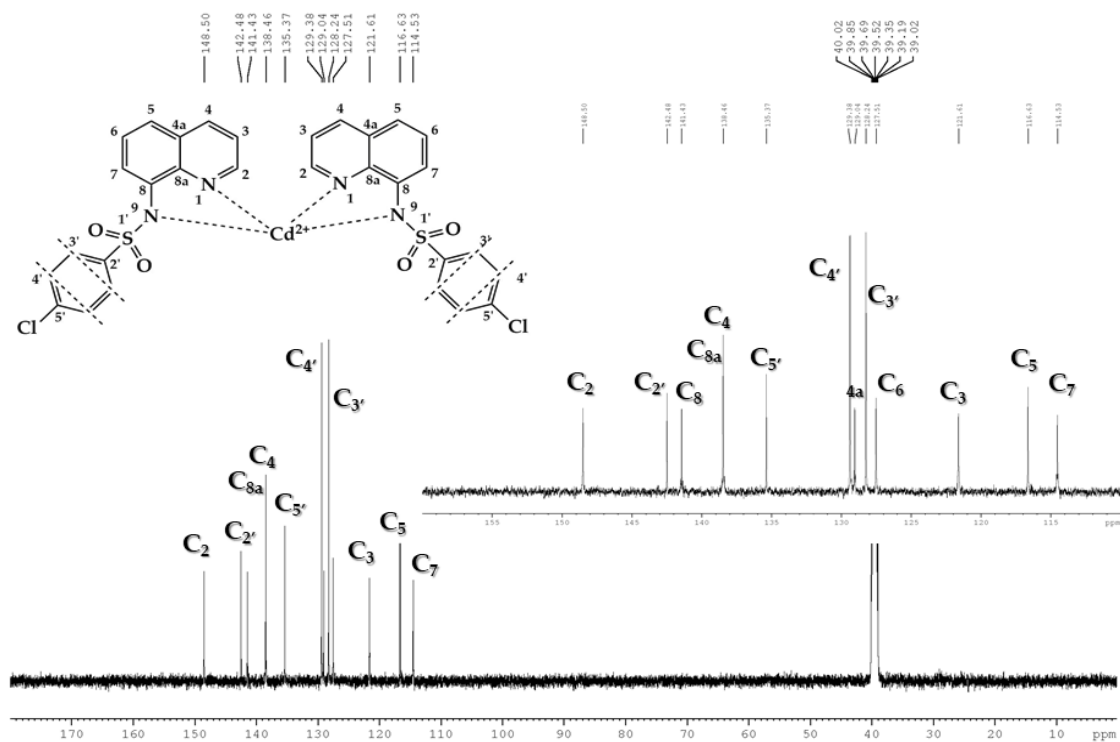

[Cd(N-(quinoline-8-yl)-4-chloro-benzenesulfonamide)<sub>2</sub>] (4d)

2D-HMBC detail

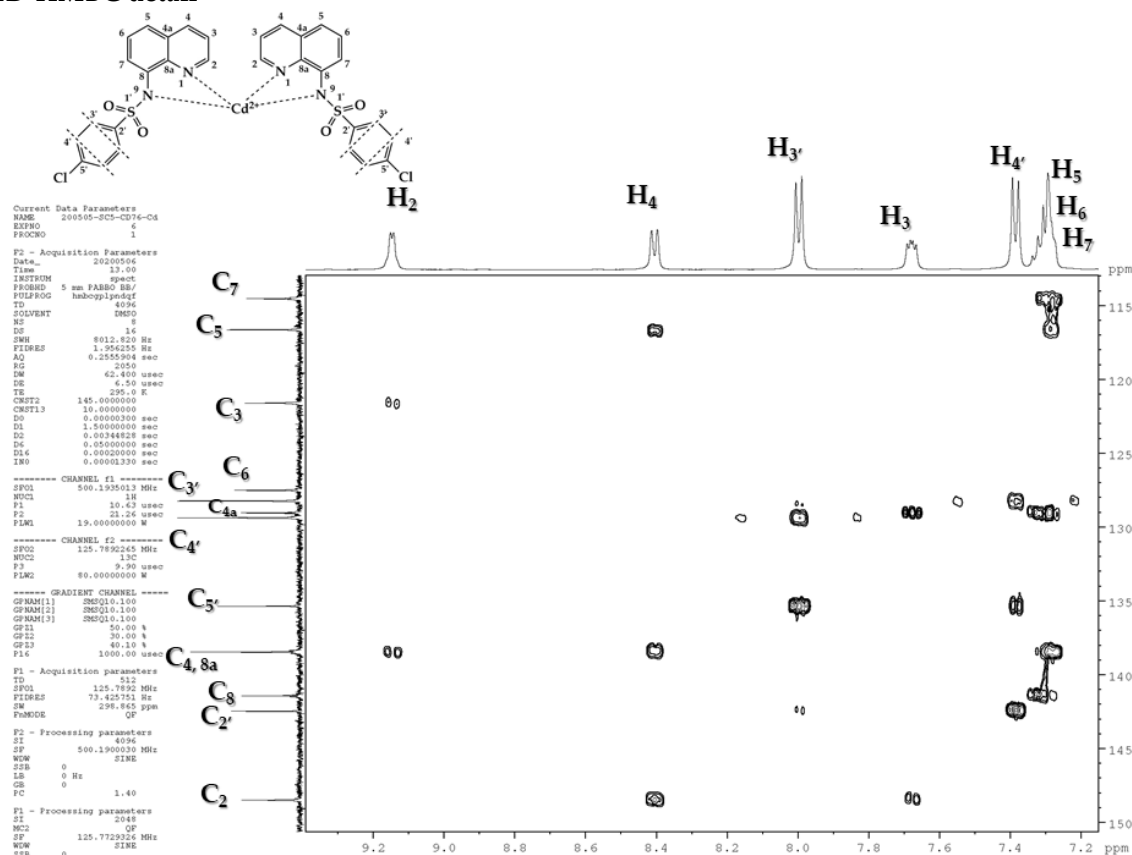

## CheckCIF files for X-ray data

[Cu(*N*-(quinoline-8-yl)-4-chloro-benzenesulfonamide)<sub>2</sub>] (**4b**)

### checkCIF/PLATON report

Structure factors have been supplied for datablock(s) cd001tr\_cryo

THIS REPORT IS FOR GUIDANCE ONLY. IF USED AS PART OF A REVIEW PROCEDURE FOR PUBLICATION, IT SHOULD NOT REPLACE THE EXPERTISE OF AN EXPERIENCED CRYSTALLOGRAPHIC REFEREE.

No syntax errors found.    CIF dictionary    Interpreting this report

### Datablock: cd001tr\_cryo

---

|                        |                                         |                                         |               |
|------------------------|-----------------------------------------|-----------------------------------------|---------------|
| Bond precision:        | C-C = 0.0030 Å                          | Wavelength=1.54184                      |               |
| Cell:                  | a=17.1674 (5)                           | b=15.2452 (5)                           | c=24.2159 (8) |
|                        | alpha=90                                | beta=104.567 (1)                        | gamma=90      |
| Temperature:           | 100 K                                   |                                         |               |
|                        | Calculated                              | Reported                                |               |
| Volume                 | 6134.1 (3)                              | 6134.1 (3)                              |               |
| Space group            | I 2/a                                   | I 2/a                                   |               |
| Hall group             | -I 2ya                                  | -I 2ya                                  |               |
| Moiety formula         | 4(C30 H20 Cl2 Cu N4 O4 S2), C H2 Cl, Cl | C30 H20 Cl2 Cu N4 O4 S2, 0.25(C H2 Cl2) |               |
| Sum formula            | C121 H82 Cl10 Cu4 N16 O16 S8            | C30.25 H20.50 Cl2.50 Cu N4 O4 S2        |               |
| Mr                     | 2881.21                                 | 720.29                                  |               |
| Dx, g cm <sup>-3</sup> | 1.560                                   | 1.560                                   |               |
| Z                      | 2                                       | 8                                       |               |
| Mu (mm <sup>-1</sup> ) | 4.650                                   | 1.050                                   |               |
| F000                   | 2924.0                                  | 2924.0                                  |               |
| F000'                  | 2927.51                                 |                                         |               |
| h,k,lmax               | 21,18,29                                | 20,18,29                                |               |
| Nref                   | 5932                                    | 5816                                    |               |
| Tmin,Tmax              | 0.801,0.836                             | 0.613,1.000                             |               |
| Tmin'                  | 0.656                                   |                                         |               |

Correction method= # Reported T Limits: Tmin=0.613 Tmax=1.000  
AbsCorr = MULTI-SCAN

Data completeness= 0.980                    Theta(max)= 71.024

R(reflections)= 0.0367 ( 5669)            wR2(reflections)= 0.1009 ( 5816)

S = 1.066                                    Npar= 416

---

The following ALERTS were generated. Each ALERT has the format  
**test-name ALERT alert-type alert-level.**  
Click on the hyperlinks for more details of the test.

---

**Alert level A**

ABSMU01\_ALERT\_1\_A The ratio of given/expected absorption coefficient lies  
outside the range 0.90 <> 1.10  
Calculated value of mu = 4.650  
Value of mu given = 1.050  
PLAT051\_ALERT\_1\_A Mu(calc) and Mu(CIF) Ratio Differs from 1.0 by . 342.81 %

---

**Alert level C**

PLAT031\_ALERT\_4\_C Refined Extinction Parameter Within Range ..... 2.667 Sigma  
PLAT094\_ALERT\_2\_C Ratio of Maximum / Minimum Residual Density .... 2.23 Report  
PLAT336\_ALERT\_2\_C Long Bond Distance for ..... C2 -C11 1.909 Ang.  
PLAT911\_ALERT\_3\_C Missing FCF Refl Between Thmin & STh/L= 0.600 6 Report  
PLAT975\_ALERT\_2\_C Check Calcd Resid. Dens. 0.56A From C2 1.06 eA-3

---

**Alert level G**

PLAT003\_ALERT\_2\_G Number of Uiso or Uij Restrained non-H Atoms ... 3 Report  
PLAT042\_ALERT\_1\_G Calc. and Reported MoietyFormula Strings Differ Please Check  
PLAT045\_ALERT\_1\_G Calculated and Reported Z Differ by a Factor ... 0.25 Check  
PLAT083\_ALERT\_2\_G SHELXL Second Parameter in WGHT Unusually Large 13.98 Why ?  
PLAT186\_ALERT\_4\_G The CIF-Embedded .res File Contains ISOR Records 2 Report  
PLAT300\_ALERT\_4\_G Atom Site Occupancy of C11 Constrained at 0.25 Check  
PLAT300\_ALERT\_4\_G Atom Site Occupancy of C2 Constrained at 0.25 Check  
PLAT300\_ALERT\_4\_G Atom Site Occupancy of H2A Constrained at 0.25 Check  
PLAT300\_ALERT\_4\_G Atom Site Occupancy of H2B Constrained at 0.25 Check  
PLAT300\_ALERT\_4\_G Atom Site Occupancy of Cl2 Constrained at 0.25 Check  
PLAT302\_ALERT\_4\_G Anion/Solvent/Minor-Residue Disorder (Resd 2 ) 100% Note  
PLAT302\_ALERT\_4\_G Anion/Solvent/Minor-Residue Disorder (Resd 3 ) 100% Note  
PLAT304\_ALERT\_4\_G Non-Integer Number of Atoms in ..... (Resd 3 ) 0.25 Check  
PLAT432\_ALERT\_2\_G Short Inter X...Y Contact C12 ..C2 2.10 Ang.  
X,y,z = 1\_555 Check  
PLAT432\_ALERT\_2\_G Short Inter X...Y Contact C12 ..C2 2.68 Ang.  
3/2-x,y,1-z = 2\_656 Check  
PLAT432\_ALERT\_2\_G Short Inter X...Y Contact O009 ..C2 2.99 Ang.  
3/2-x,y,1-z = 2\_656 Check  
PLAT432\_ALERT\_2\_G Short Inter X...Y Contact C2 ..C2 2.70 Ang.  
3/2-x,y,1-z = 2\_656 Check  
PLAT720\_ALERT\_4\_G Number of Unusual/Non-Standard Labels ..... 63 Note  
PLAT789\_ALERT\_4\_G Atoms with Negative \_atom\_site\_disorder\_group # 1 Check  
PLAT793\_ALERT\_4\_G Model has Chirality at S002 (Centro SPGR) R Verify  
PLAT860\_ALERT\_3\_G Number of Least-Squares Restraints ..... 18 Note  
PLAT912\_ALERT\_4\_G Missing # of FCF Reflections Above STh/L= 0.600 109 Note  
PLAT941\_ALERT\_3\_G Average HKL Measurement Multiplicity ..... 3.0 Low  
PLAT978\_ALERT\_2\_G Number C-C Bonds with Positive Residual Density. 7 Info  
PLAT992\_ALERT\_5\_G Repd & Actual \_reflns\_number\_gt Values Differ by 1 Check

---

2 **ALERT level A** = Most likely a serious problem - resolve or explain  
0 **ALERT level B** = A potentially serious problem, consider carefully  
5 **ALERT level C** = Check. Ensure it is not caused by an omission or oversight  
25 **ALERT level G** = General information/check it is not something unexpected

4 ALERT type 1 CIF construction/syntax error, inconsistent or missing data

10 ALERT type 2 Indicator that the structure model may be wrong or deficient  
3 ALERT type 3 Indicator that the structure quality may be low  
14 ALERT type 4 Improvement, methodology, query or suggestion  
1 ALERT type 5 Informative message, check

---

It is advisable to attempt to resolve as many as possible of the alerts in all categories. Often the minor alerts point to easily fixed oversights, errors and omissions in your CIF or refinement strategy, so attention to these fine details can be worthwhile. In order to resolve some of the more serious problems it may be necessary to carry out additional measurements or structure refinements. However, the purpose of your study may justify the reported deviations and the more serious of these should normally be commented upon in the discussion or experimental section of a paper or in the "special\_details" fields of the CIF. checkCIF was carefully designed to identify outliers and unusual parameters, but every test has its limitations and alerts that are not important in a particular case may appear. Conversely, the absence of alerts does not guarantee there are no aspects of the results needing attention. It is up to the individual to critically assess their own results and, if necessary, seek expert advice.

#### **Publication of your CIF in IUCr journals**

A basic structural check has been run on your CIF. These basic checks will be run on all CIFs submitted for publication in IUCr journals (*Acta Crystallographica*, *Journal of Applied Crystallography*, *Journal of Synchrotron Radiation*); however, if you intend to submit to *Acta Crystallographica Section C* or *E* or *IUCrData*, you should make sure that full publication checks are run on the final version of your CIF prior to submission.

#### **Publication of your CIF in other journals**

Please refer to the *Notes for Authors* of the relevant journal for any special instructions relating to CIF submission.

---

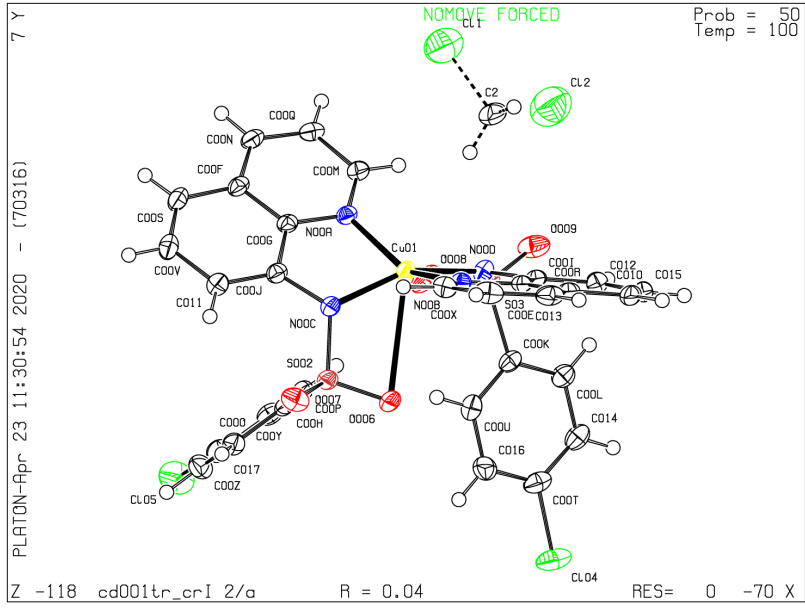



[Co(*N*-(quinoline-8-yl)-4-chloro-benzenesulfonamide)<sub>2</sub>] (4c)

## checkCIF/PLATON report

Structure factors have been supplied for datablock(s) cd002tr\_cryo

THIS REPORT IS FOR GUIDANCE ONLY. IF USED AS PART OF A REVIEW PROCEDURE FOR PUBLICATION, IT SHOULD NOT REPLACE THE EXPERTISE OF AN EXPERIENCED CRYSTALLOGRAPHIC REFEREE.

No syntax errors found. CIF dictionary Interpreting this report

### Datablock: cd002tr\_cryo

---

Bond precision: C-C = 0.0024 Å Wavelength=1.54184

Cell: a=12.1381(2) b=15.5893(2) c=16.1980(3)  
alpha=90 beta=106.347(2) gamma=90

Temperature: 100 K

|                        | Calculated              | Reported                |
|------------------------|-------------------------|-------------------------|
| Volume                 | 2941.15(9)              | 2941.15(9)              |
| Space group            | P 21/n                  | P 21/n                  |
| Hall group             | -P 2yn                  | -P 2yn                  |
| Moiety formula         | C30 H20 Cl2 Co N4 O4 S2 | ?                       |
| Sum formula            | C30 H20 Cl2 Co N4 O4 S2 | C30 H20 Cl2 Co N4 O4 S2 |
| Mr                     | 694.45                  | 694.45                  |
| Dx, g cm <sup>-3</sup> | 1.568                   | 1.568                   |
| Z                      | 4                       | 4                       |
| Mu (mm <sup>-1</sup> ) | 7.948                   | 7.958                   |
| F000                   | 1412.0                  | 1412.0                  |
| F000'                  | 1411.58                 |                         |
| h, k, lmax             | 14, 19, 19              | 14, 19, 19              |
| Nref                   | 5660                    | 5608                    |
| Tmin, Tmax             | 0.518, 0.651            | 0.235, 1.000            |
| Tmin'                  | 0.023                   |                         |

Correction method= # Reported T Limits: Tmin=0.235 Tmax=1.000  
AbsCorr = GAUSSIAN

Data completeness= 0.991 Theta(max)= 70.836

R(reflections)= 0.0259( 5425) wR2(reflections)= 0.0693( 5608)

S = 1.037 Npar= 388

---

The following ALERTS were generated. Each ALERT has the format  
**test-name\_ALERT\_alert-type\_alert-level**.  
Click on the hyperlinks for more details of the test.

---

**Alert level G**

|                   |                                                  |              |       |       |
|-------------------|--------------------------------------------------|--------------|-------|-------|
| PLAT434_ALERT_2_G | Short Inter HL..HL Contact Cl1                   | ..Cl1        | 3.35  | Ang.  |
|                   |                                                  | -x,2-y,2-z = | 3_577 | Check |
| PLAT794_ALERT_5_G | Tentative Bond Valency for Co1                   | (II)         | 1.86  | Info  |
| PLAT912_ALERT_4_G | Missing # of PCF Reflections Above STh/L=        | 0.600        | 51    | Note  |
| PLAT978_ALERT_2_G | Number C-C Bonds with Positive Residual Density. |              | 14    | Info  |

---

0 **ALERT level A** = Most likely a serious problem - resolve or explain  
0 **ALERT level B** = A potentially serious problem, consider carefully  
0 **ALERT level C** = Check. Ensure it is not caused by an omission or oversight  
4 **ALERT level G** = General information/check it is not something unexpected

0 ALERT type 1 CIF construction/syntax error, inconsistent or missing data  
2 ALERT type 2 Indicator that the structure model may be wrong or deficient  
0 ALERT type 3 Indicator that the structure quality may be low  
1 ALERT type 4 Improvement, methodology, query or suggestion  
1 ALERT type 5 Informative message, check

---

It is advisable to attempt to resolve as many as possible of the alerts in all categories. Often the minor alerts point to easily fixed oversights, errors and omissions in your CIF or refinement strategy, so attention to these fine details can be worthwhile. In order to resolve some of the more serious problems it may be necessary to carry out additional measurements or structure refinements. However, the purpose of your study may justify the reported deviations and the more serious of these should normally be commented upon in the discussion or experimental section of a paper or in the "special\_details" fields of the CIF. checkCIF was carefully designed to identify outliers and unusual parameters, but every test has its limitations and alerts that are not important in a particular case may appear. Conversely, the absence of alerts does not guarantee there are no aspects of the results needing attention. It is up to the individual to critically assess their own results and, if necessary, seek expert advice.

#### Publication of your CIF in IUCr journals

A basic structural check has been run on your CIF. These basic checks will be run on all CIFs submitted for publication in IUCr journals (*Acta Crystallographica*, *Journal of Applied Crystallography*, *Journal of Synchrotron Radiation*); however, if you intend to submit to *Acta Crystallographica Section C* or *E* or *IUCrData*, you should make sure that full publication checks are run on the final version of your CIF prior to submission.

#### Publication of your CIF in other journals

Please refer to the *Notes for Authors* of the relevant journal for any special instructions relating to CIF submission.

---

PLATON version of 22/12/2019; check.def file version of 13/12/2019

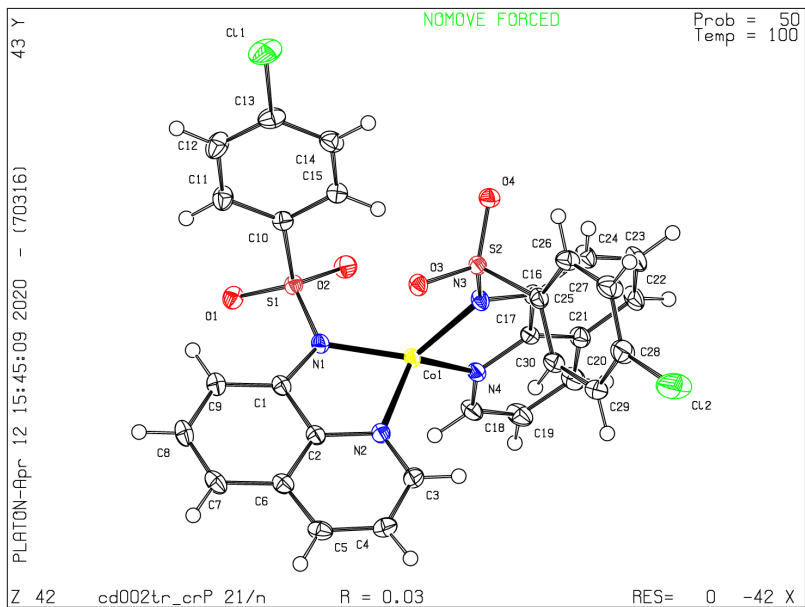

Supplement: molecules-25-02946-s001.pdf [file molecules-25-02946-s001.pdf]
